# Supplementary material
Source: publisher site journal article supplement (https://www.spandidos-publications.com/1393/downloadSupplementary)

|                   | MC-3 |     |    |    | YD-15 |      |      |    |
|-------------------|------|-----|----|----|-------|------|------|----|
| Oridonin (μM)     | 0    | 7.5 | 15 | 30 | 0     | 6.25 | 12.5 | 25 |
| Bcl-xL            |      |     |    |    |       |      |      |    |
| Active-Bak        |      |     |    |    |       |      |      |    |
| Active-Bax        |      |     |    |    |       |      |      |    |
| Bak               |      |     |    |    |       |      |      |    |
| Bax               |      |     |    |    |       |      |      |    |
| Bim <sub>EL</sub> |      |     |    |    |       |      |      |    |
| Bim <sub>L</sub>  |      |     |    |    |       |      |      |    |
| Bim <sub>S</sub>  |      |     |    |    |       |      |      |    |
| Actin             |      |     |    |    |       |      |      |    |

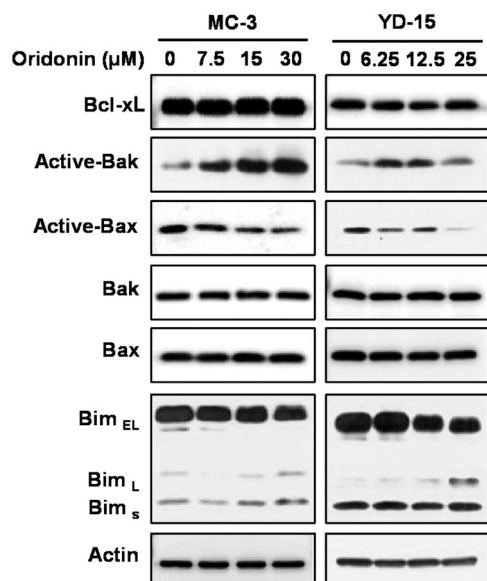

Figure S2. Effect of oridonin on MCL-1 protein turnover in MEC cell lines. (A and B) Effect of oridonin on MCL-1 protein turnover was determined by western blot analysis in MC-3 and YD-15 cells pre-treated with cycloheximide (CHX; 0.05  $\mu$ g/ml) with or without oridonin (30  $\mu$ M) for 3, 6 and 12 h. Graph shows the means  $\pm$  SD of 3 independent experiments. \* $P$ <0.05, significant difference compared with the control group. MEC, mucoepidermoid carcinoma; MCL-1, myeloid cell leukemia-1.

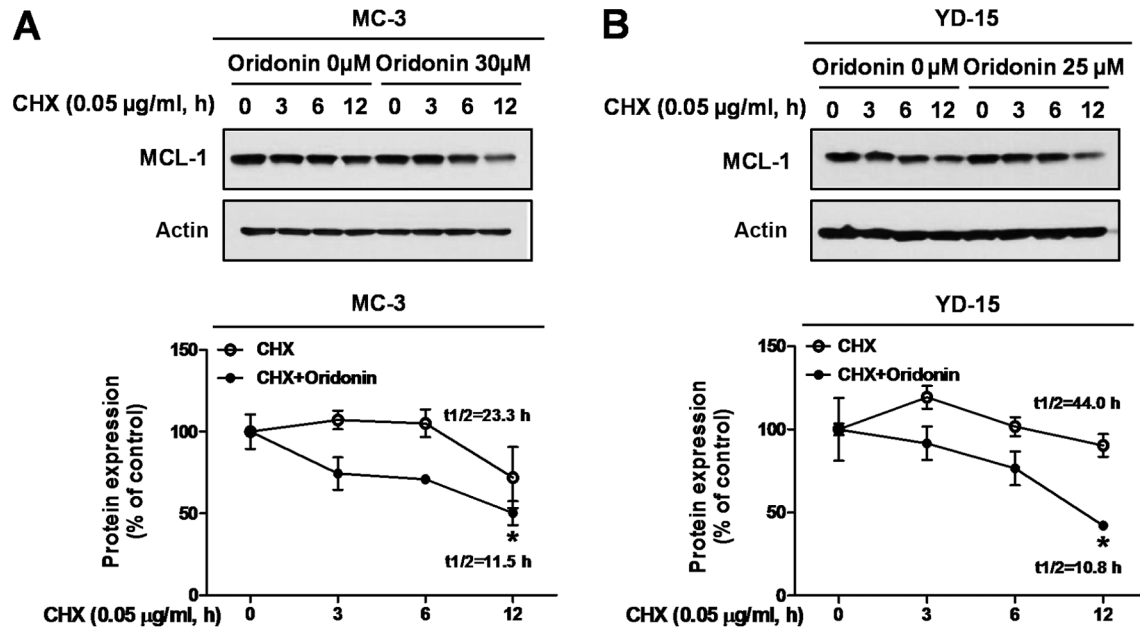

Supplement: Supplementary file 1 [file downloadSupplementary]
